# Supplementary material for: Asymmetric reductive amination by a wild-type amine dehydrogenase from the thermophilic bacteria Petrotoga mobilis
Source: Royal Society of Chemistry journal article supplement (doi:10.1039/c6cy01625a), 2016-01-01
Supplement: c6cy01625a1.pdf [file c6cy01625a1.pdf]

## Supporting Information

for

### Asymmetric reductive amination by a wild-type amine dehydrogenase from the thermophilic bacteria *Petrotoga mobilis*

*Ombeline Mayol,<sup>abc†</sup> Sylvain David,<sup>abc†</sup> Ekaterina Darii,<sup>abc</sup> Adrien Debard,<sup>abc</sup> Aline Mariage,<sup>abc</sup>  
Virginie Pellouin,<sup>abc</sup> Jean-Louis Petit,<sup>abc</sup> Marcel Salanoubat,<sup>abc</sup> Véronique de Berardinis,<sup>abc</sup> Anne  
Zaparucha<sup>abc</sup> and Carine Vergne-Vaxelaire.<sup>abc</sup> \**

<sup>a</sup>CEA, DRF, IG, Genoscope, 2 rue Gaston Crémieux, 91057 Evry (France)

<sup>b</sup>CNRS-UMR8030 Génomique Métabolique, 2 rue Gaston Crémieux, 91057 Evry (France)

<sup>c</sup>Université Evry Val d'Essonne, Boulevard François Mitterrand, 91025 Evry (France)

#### Table of contents

|                    |   |
|--------------------|---|
| 1. Figure S1 ..... | 2 |
| 2. Figure S2 ..... | 2 |
| 3. Figure S3 ..... | 3 |
| 4. Figure S4 ..... | 3 |
| 5. Figure S5 ..... | 4 |
| 6. Figure S6 ..... | 5 |
| 7. Figure S7 ..... | 6 |
| 8. Figure S8 ..... | 7 |
| 9. Figure S9 ..... | 8 |

## 1. Figure S1

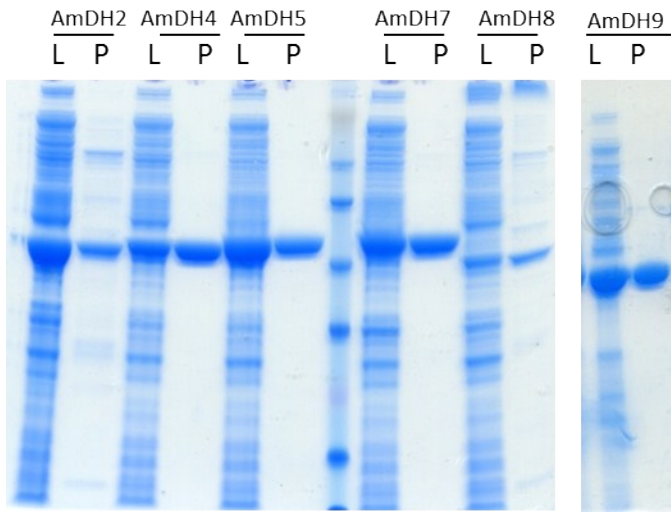

Figure S1. His-tag purification of AmDHs. L: cell free extract, P: pure protein elution fraction

## 2. Figure S2

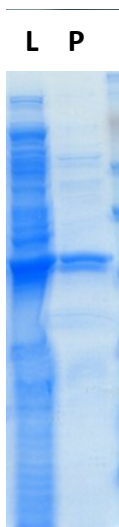

Figure S2. Heat treatment purification of AmDH4. L: cell free extract, P: purified enzyme (clarified enzyme solution after heat treatment and centrifugation)

### 3. Figure S3

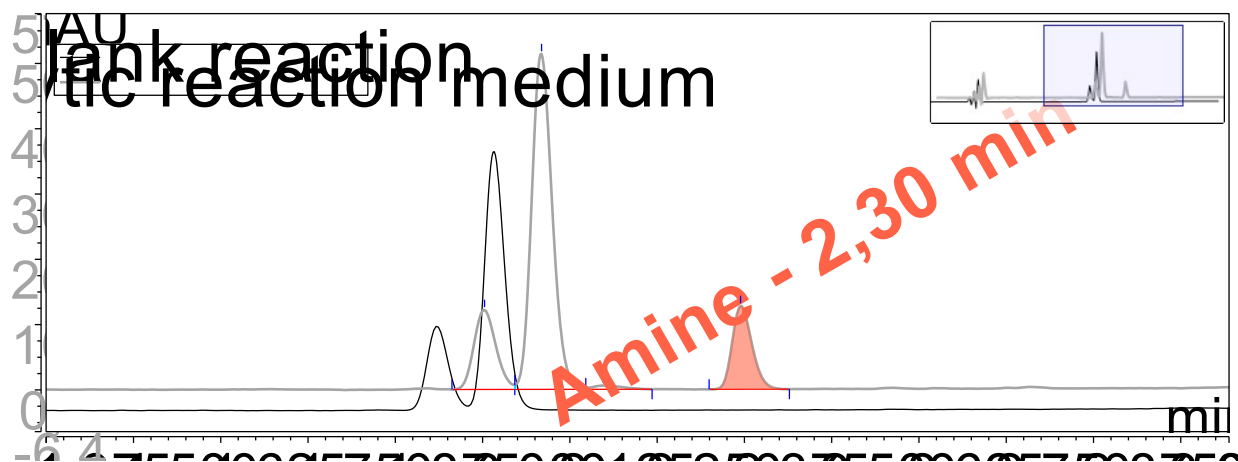

Figure S3. UHPLC Chromatogram of the DNFB-derivatized mixture of AmDH4-catalyzed amination of 4-ketopentanoic acid (**6**) to 4-aminopentanoic acid (**9**) a) reaction medium b) blank reaction without enzyme AmDH4 (UHPLC conditions A).

### 4. Figure S4

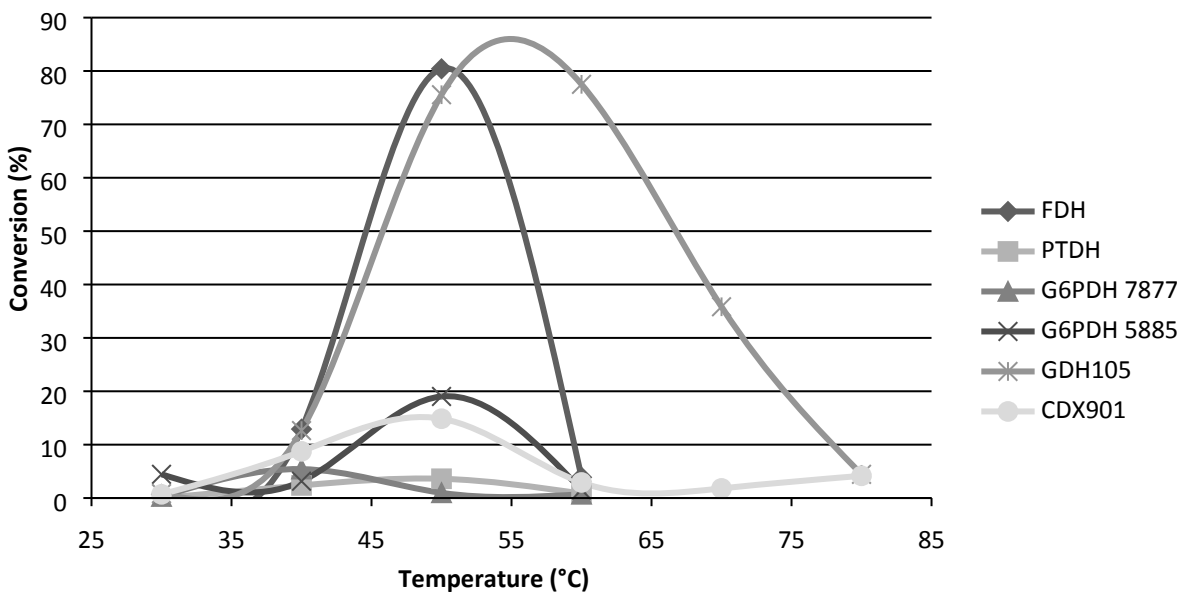

Figure S4: Conversions obtained with various cofactor recycling system. Reactions conditions: 4-oxopentanoic acid (**6**) 10 mM, NADH 0.4 mM,  $\text{NH}_4\text{Cl}$  200 mM,  $\text{NaHCO}_3/\text{Na}_2\text{CO}_3$  buffer 100

mM pH 9.5, AmDH4 0.1 mg/mL, cofactor recycling enzyme 3U/ml, coenzyme substrate 20 mM, 48h.

### 5. Figure S5

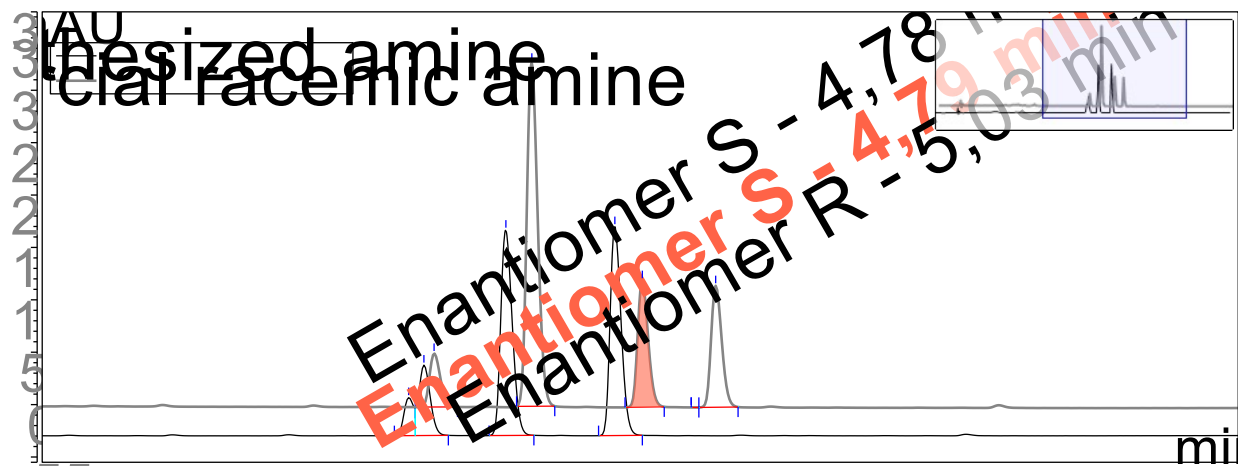

Figure S5. UHPLC Chromatogram obtained from FDAA derivatization of a) synthesized (4*S*)-4-aminopentanoic acid (**9**), b) commercial racemic amine rac-**9** (UHPLC conditions B).

## 6. Figure S6

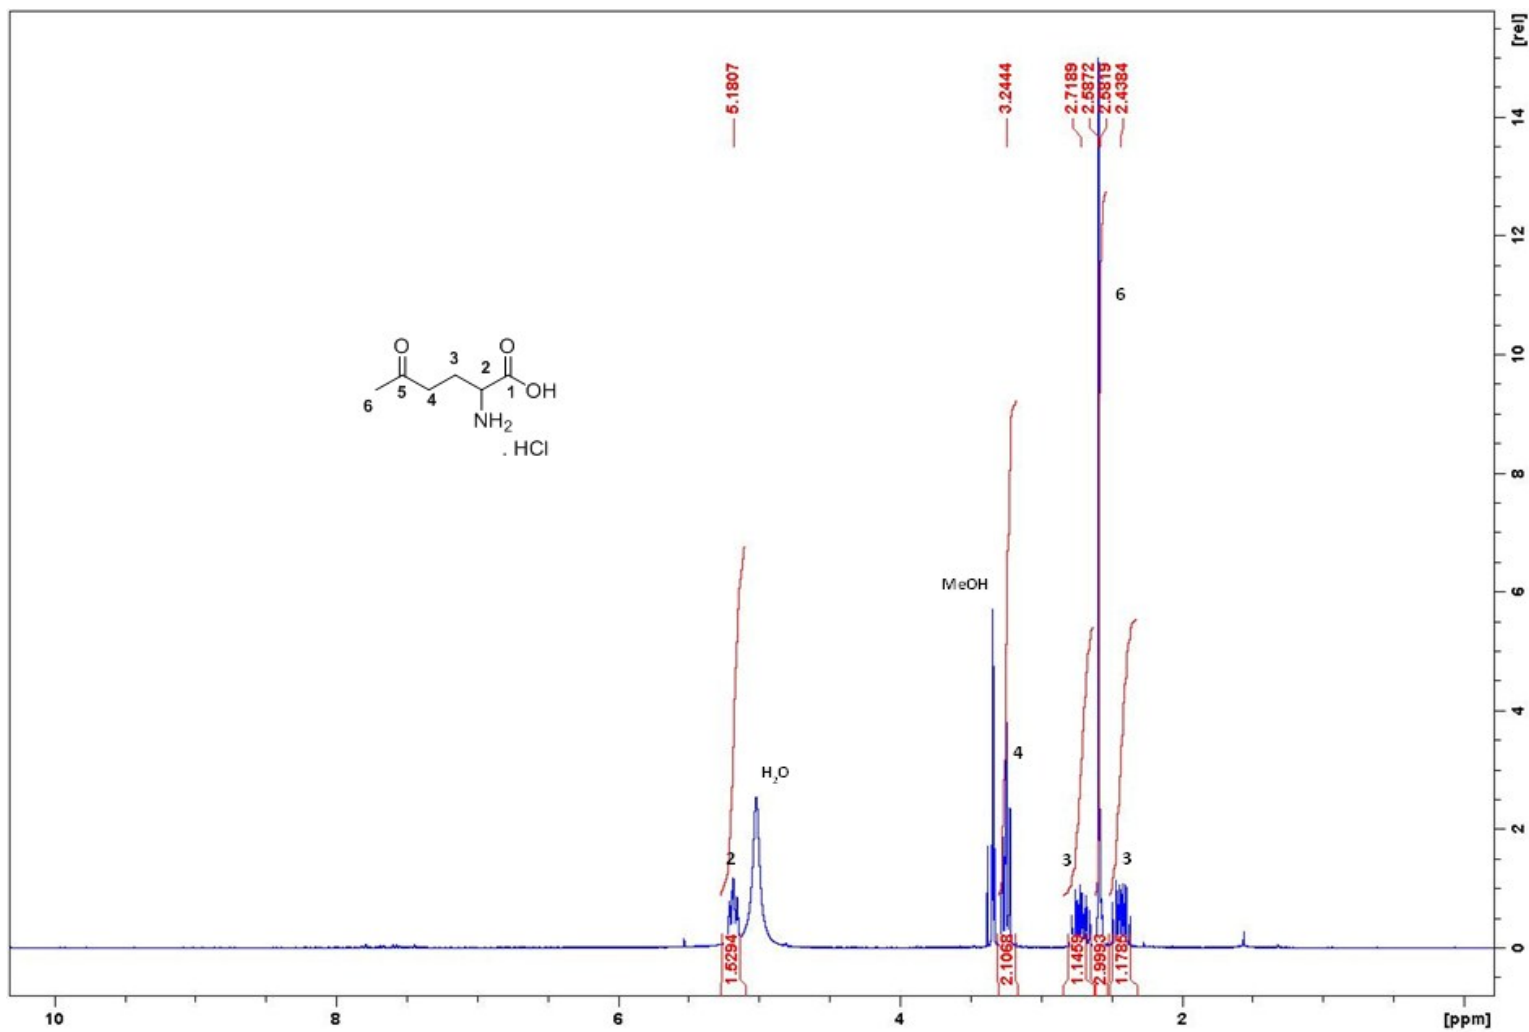

Figure S6.  $^1\text{H}$  NMR spectrum of rac-3

## 7. Figure S7

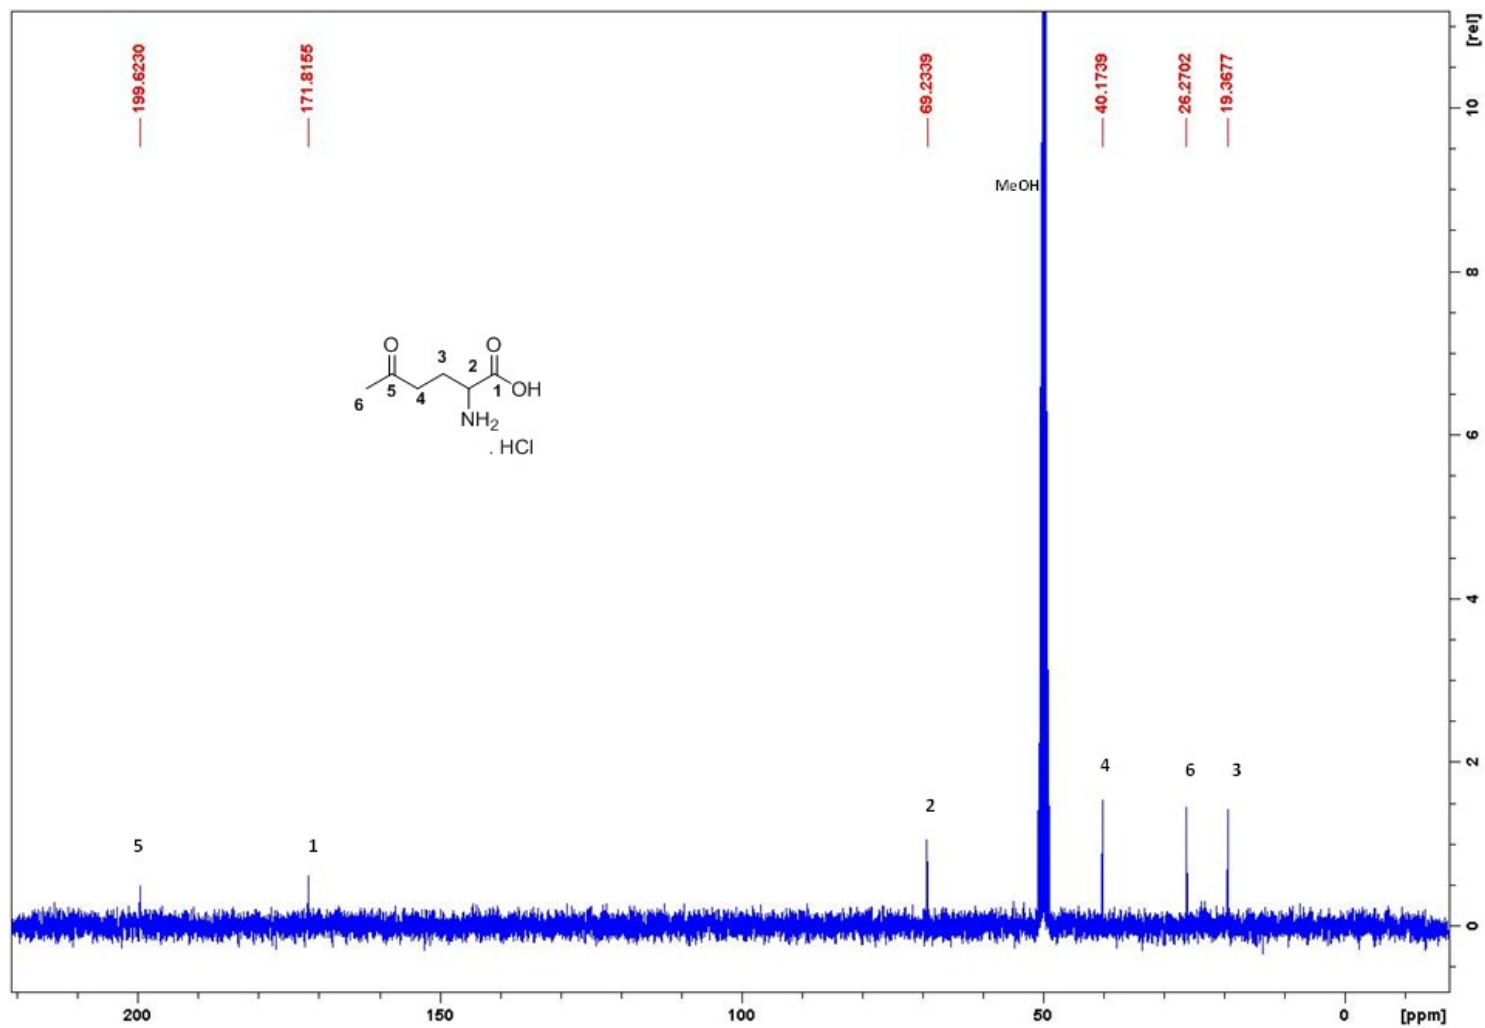

Figure S7.  $^{13}\text{C}$  NMR spectrum of rac-3

## 8. Figure S8

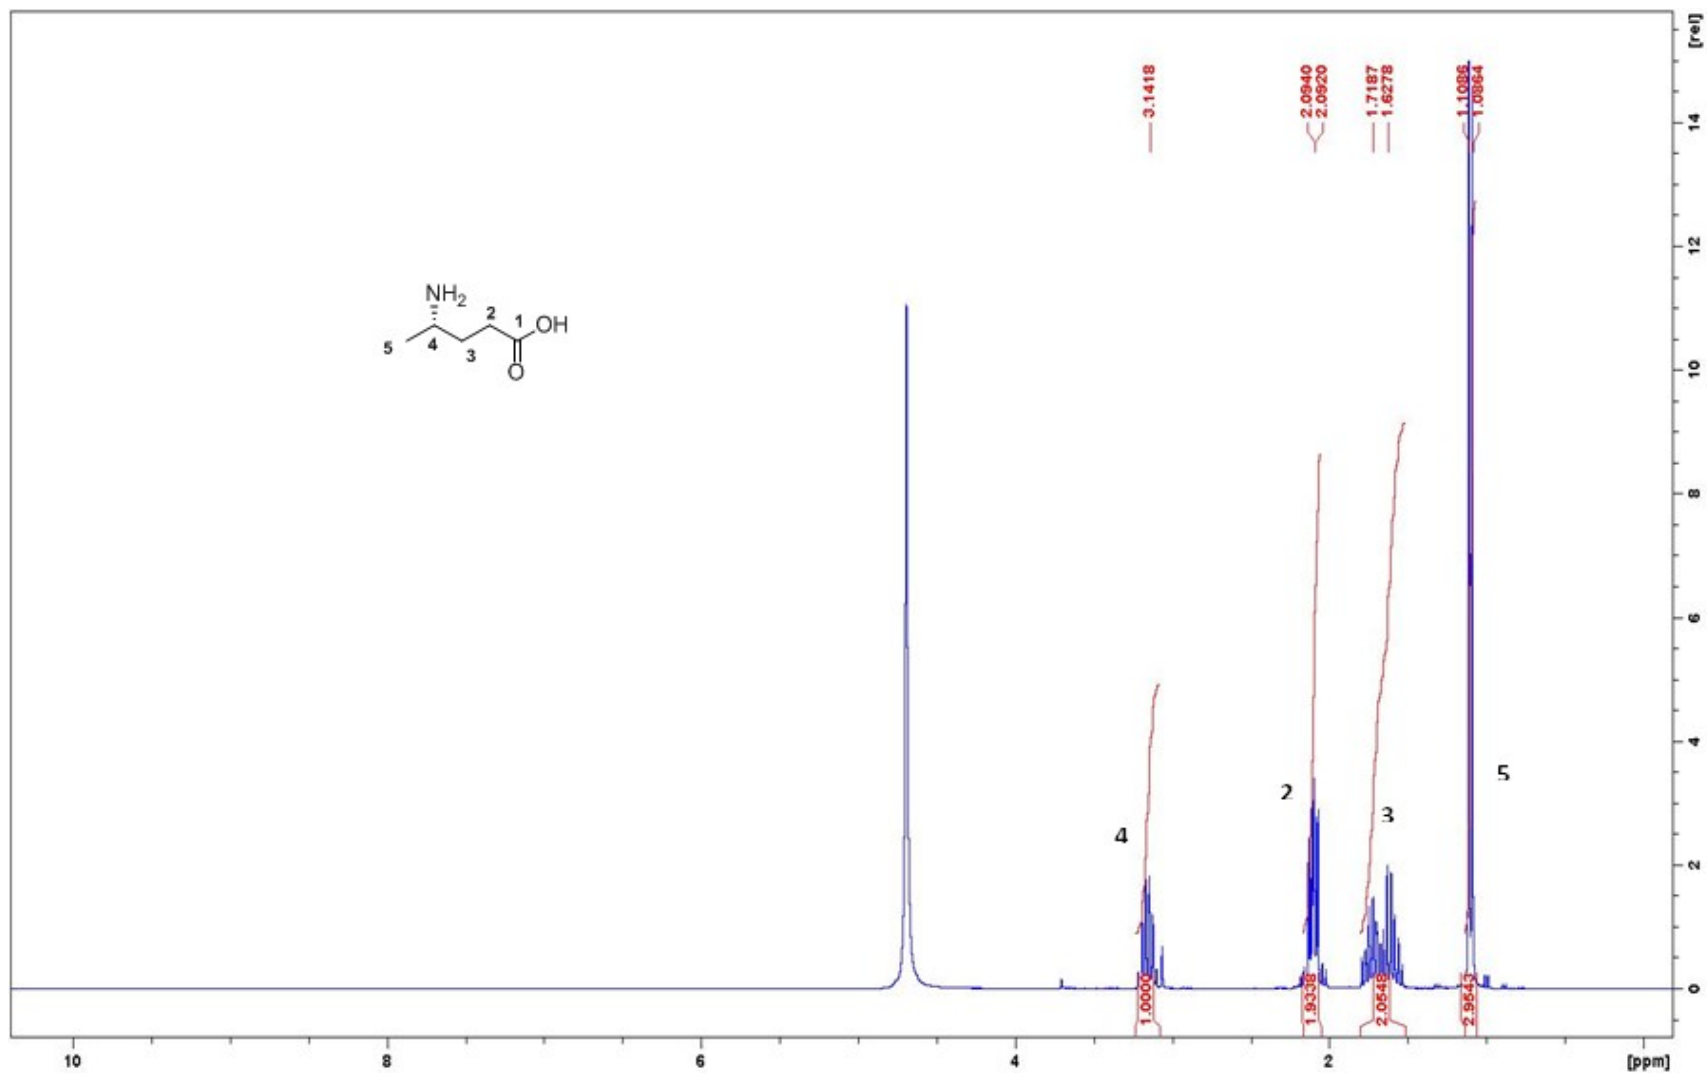

Figure S8. <sup>1</sup>H NMR spectrum of (4S)-9

## 9. Figure S9

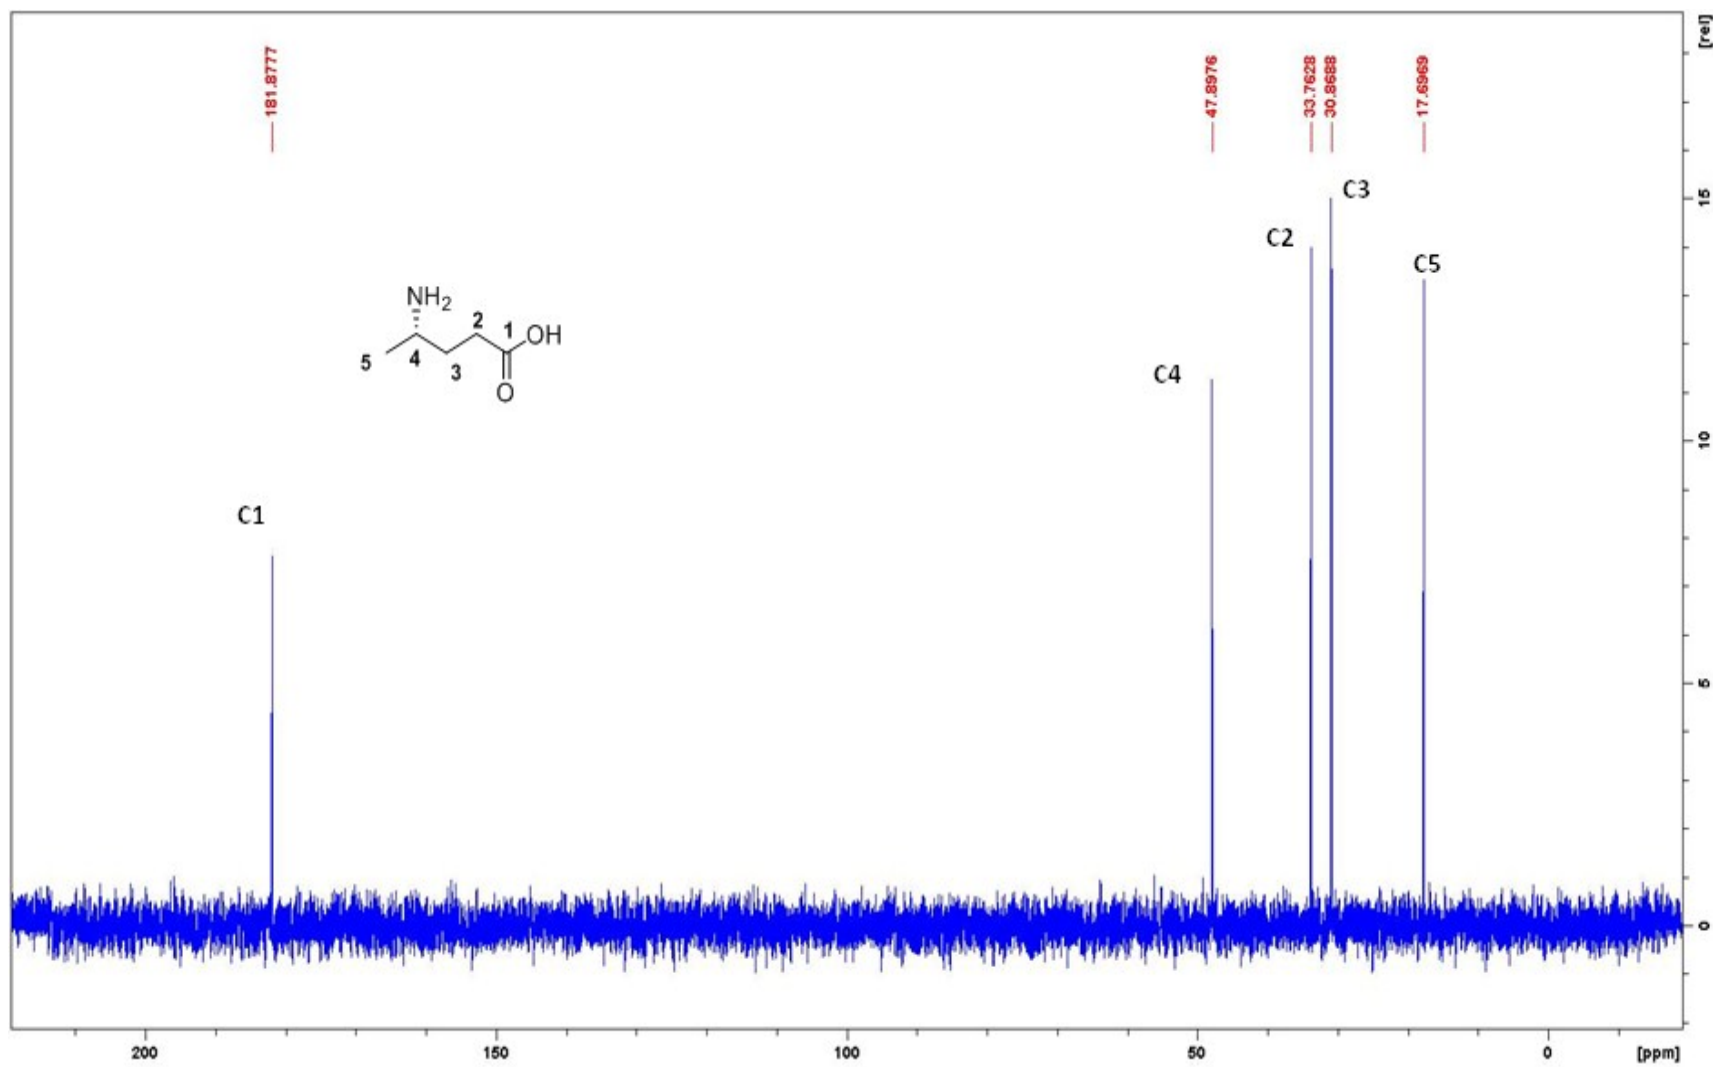

Figure S9.  $^{13}\text{C}$  NMR spectrum of (4S)-9
